# Supplementary material
Source: Royal Society of Chemistry journal article supplement (doi:10.1039/d6nj00884d)
Supplement: d6nj00884d1.pdf [file d6nj00884d1.pdf]

## Supporting Information

### Self-assembly mediated 3D Architectural Multiple-heteroatoms Doped Porous Carbons for Supercapacitors

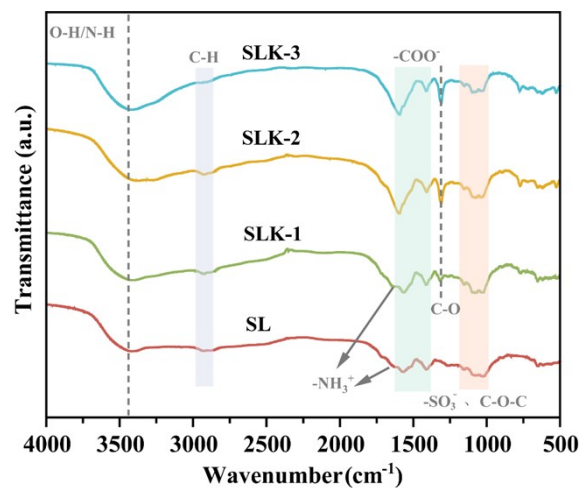

Fig.S1. The FTIR spectra of SL, SLK-1, SLK-2, and SLK-3.

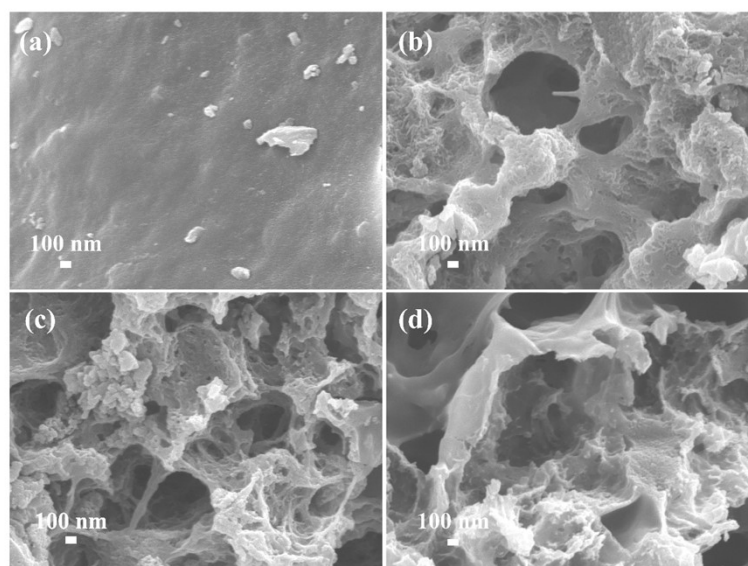

Fig.S2. (a-d) SEM image of SLC, SLKC-1, SLKC-2, SLKC-3.

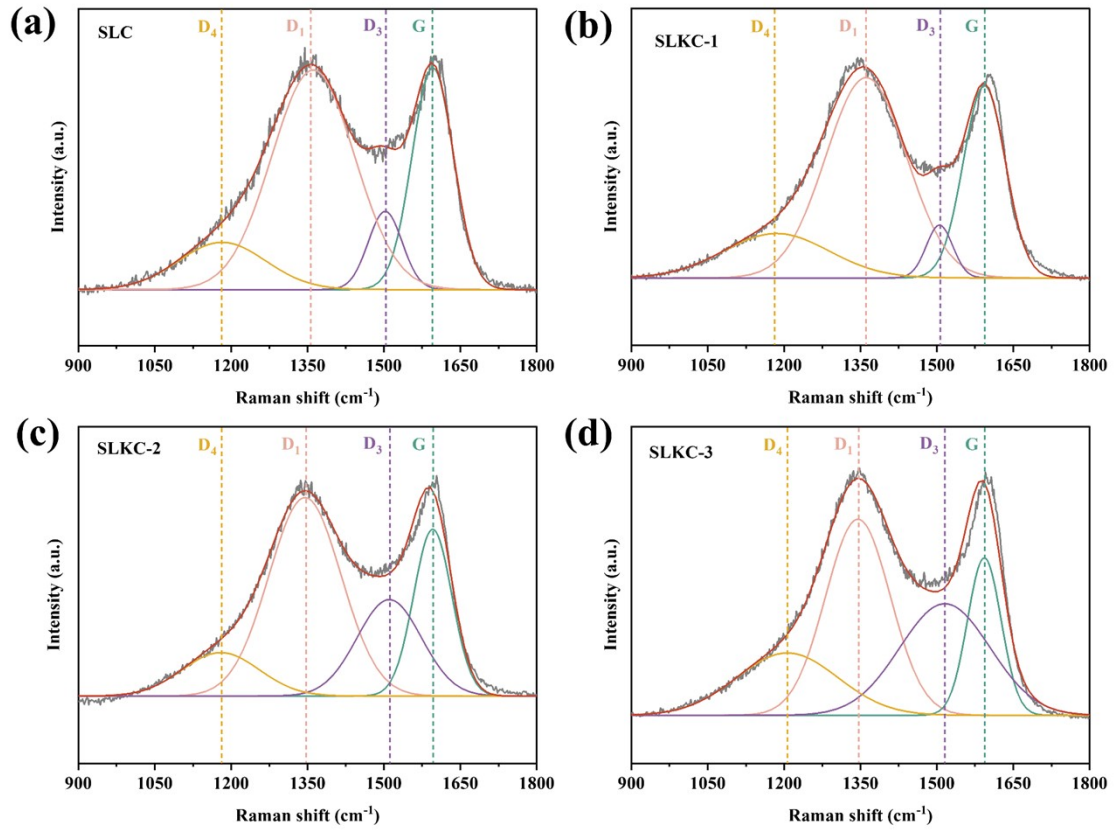

Fig.S3. (a-d) Deconvoluted Raman spectra of SLC, SLKC-1, SLKC-2, SLKC-3.

**Table S1. Comparison of the specific capacitances of sample SLKC-2 electroactive materials with reported carbonaceous materials.**

| Sample                | Electrolytes                         | Current density (A g <sup>-1</sup> ) | C <sub>g</sub> (F g <sup>-1</sup> ) | References       |
|-----------------------|--------------------------------------|--------------------------------------|-------------------------------------|------------------|
| CF                    | 6 M KOH                              | 1.0                                  | 182.7                               | 1                |
| AC                    | 6 M KOH                              | 0.5                                  | 128                                 | 2                |
| HPCF                  | 6 M KOH                              | 1.0                                  | 206                                 | 3                |
| NKC-3                 | 1 M H <sub>2</sub> SO <sub>4</sub>   | 0.5                                  | 194.6                               | 4                |
| AO-PC                 | 1 M H <sub>2</sub> SO <sub>4</sub>   | 0.5                                  | 193                                 | 5                |
| graphene/BPC          | 6 M KOH                              | 0.5                                  | 215.8                               | 6                |
| OPAC-PMA              | 0.5 M H <sub>2</sub> SO <sub>4</sub> | 1.0                                  | 126                                 | 7                |
| KZAC                  | 6 M KOH                              | 0.5                                  | 148                                 | 8                |
| MnO <sub>2</sub> @ BL | 1 M Na <sub>2</sub> SO <sub>4</sub>  | 0.5                                  | 76                                  | 9                |
| PB-15                 | 6 M KOH                              | 0.5                                  | 199                                 | 10               |
| <b>SLKC-2</b>         | <b>6 M KOH</b>                       | <b>0.5</b>                           | <b>235</b>                          | <b>This work</b> |

- Z. Xin, W. Fang, L. Zhao, H. Chen, X. He and W. Zhang, *J. Porous Mater.*, 2018, 25, 1521-1529.
- L. Qin, Z. Hou, S. Lu, S. Liu, Z. Liu and E. Jiang, *Int. J. Electrochem. Sci.*, 2019, 14, 8907-8918.
- Y. Lv, L. Gan, M. Liu, W. Xiong, Z. Xu, D. Zhu and D. S. Wright, *J. Power Sources.*, 2012, 209, 152-157.
- C. Wang, D. Wang, S. Zheng, X. Fang, W. Zhang, Y. Tian, H. Lin, H. Lu and L. Jiang, *Chem. Res. Chin. Univ.*, 2018, 34, 983-988.
- R. Atchudan, S. Perumal, A. K. Sundramoorthy, D. Manoj, R. S. Kumar, A. I. Almansour and Y. R. Lee, *Nanomaterials (Basel)*, 2023, 13, 1654.
- M. Xu, A. Wang, Y. Xiang and J. Niu, *J. Cleaner Prod.*, 2021, 315, 128110.
- Madhusree, J.E, P. R. Chandewar, D. Shee and S. Sankar Mal, *J. Electroanal. Chem.*, 2023, 936, 117354.
- D. P. Bhattarai, S. Aryal, K. R. Shrestha, P. K. Mishra, T. Shrestha, P. L. Homagai, H. B. Oli and R. L. Shrestha, *Mater. Adv.*, 2025, 6, 1635-1646.
- J. Yu, M. Li, X. Wang and Z. Yang, *ACS Omega*, 2020, 5, 16299-16306.
- M. Zhang, M. Chen, N. Reddeppa, D. Xu, Q. Jing and R. Zha, *Nanoscale*, 2018, 10, 6549-6557.
